# Supplementary material for: Cognitive Training Therapy Improves the Effect of Hypocaloric Treatment on Subjects with Overweight/Obesity: A Randomised Clinical Trial
Source: MDPI journal article supplement (doi:10.3390/nu11040925), 2019-04-24

## Supplementary information SI-1. Neurocognitive Intervention Additional information.

COGNITIVE group participants performed a cognitive training during 12 sessions, carried out during the 3 months of hypocaloric treatment. The training was carried out with the PC game Brain Exercise™ (Bandai Namco Games Ltd.).

Participants held the training sessions on an HP 250 G3 Notebook PC (Windows 10), with a 15-inch screen, and a resolution of 1366x768x40 Hz. The performance achieved by each participant in each session was recorded to analyze the evolution of the subjects. The participants made a total of 12 practice exercises, which implies approximately 30 minutes per session.

Brain Exercise™ game was selected because is one of the most popular memory training games in the world (PC version of the Brain Training game console, Nintendo Co. Ltd.) (Figure S2). In addition, this game was developed with a high level of evidence in neuropsychology and psychology<sup>(1,2)</sup>, and above all, because previous studies have shown its effectiveness to increase certain cognitive functions<sup>(3-6)</sup>.

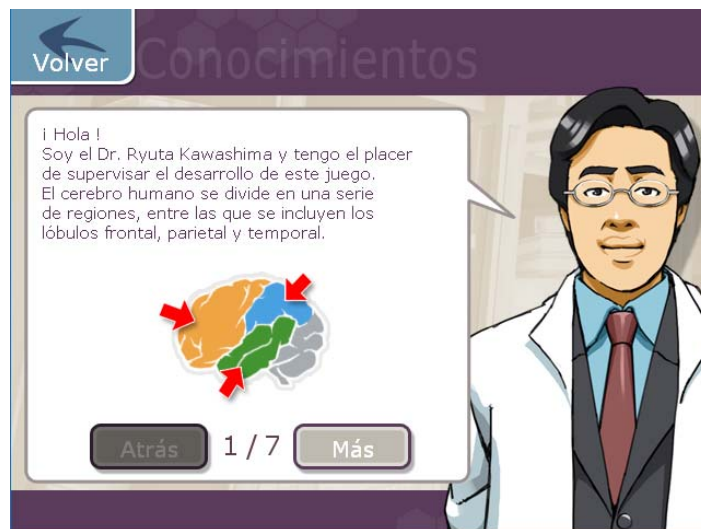

Figure S2. Brain Exercise® video game screenshot

This game allows the specific training of three central regions, the frontal lobe, parietal and temporal (Figure S3).

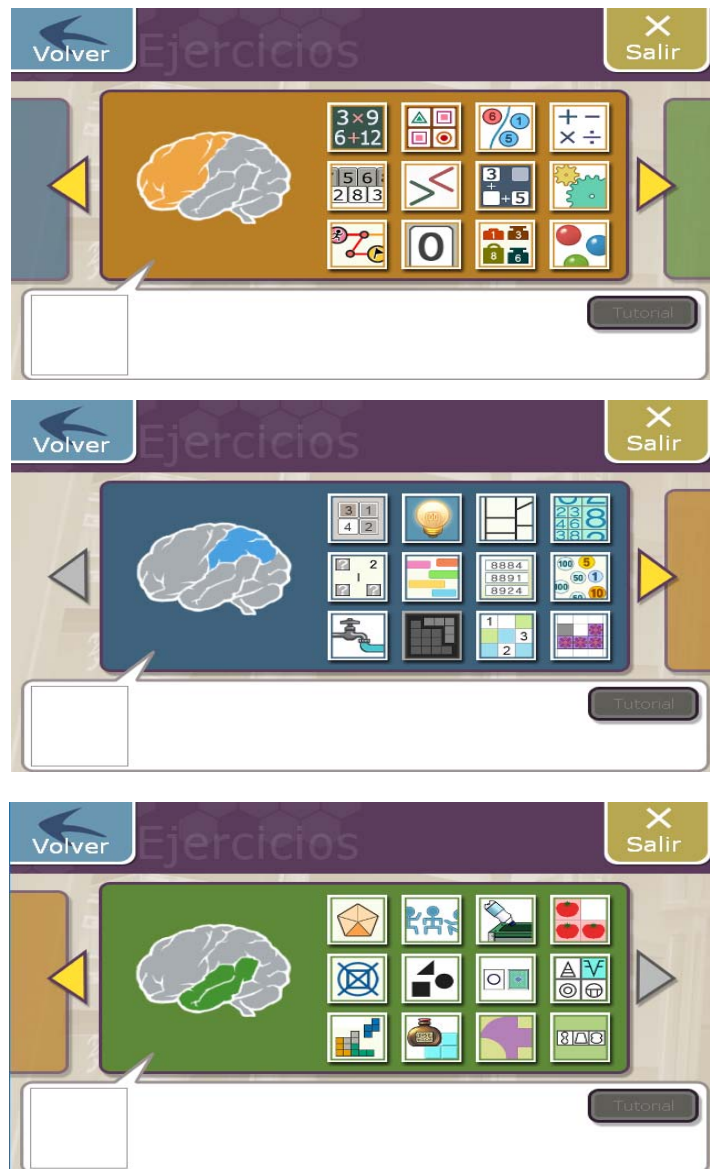

**Figure S3. Examples of Brain Exercise® video game Exercises by brain regions**

The exercises included in these sessions were based on sorting (e.g., classifying subjects attending to a rule), memory (e.g. remembering the precise location of an object), calculations (e.g. mathematical problems), working memory, logical problems and similar games.

Example of memory exercise:

0

MEMORY 2

1

89

Memorized

789  
456  
123  
0

Memorize the locations of the numbers that appear, then select the correct location of the indicated number.

2

Memorized

8

789  
456  
123  
0



☐ Skip this screen from next time.

OK



LIGHTS

  
  


  
  


Memorize the locations and order of the light bulbs that turn on and correctly reproduce the sequence.

☐ Skip this screen from next time.

OK

Example of calculation exercise:

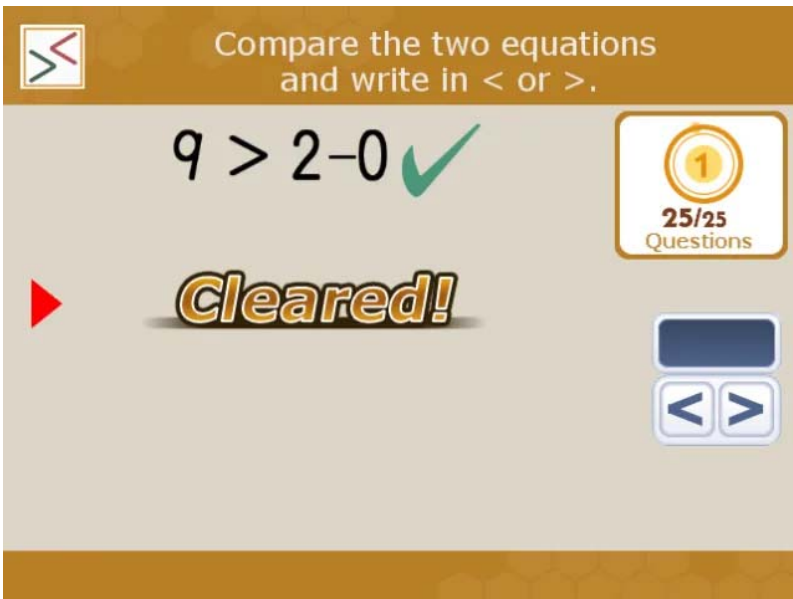

Example of sorting exercise:

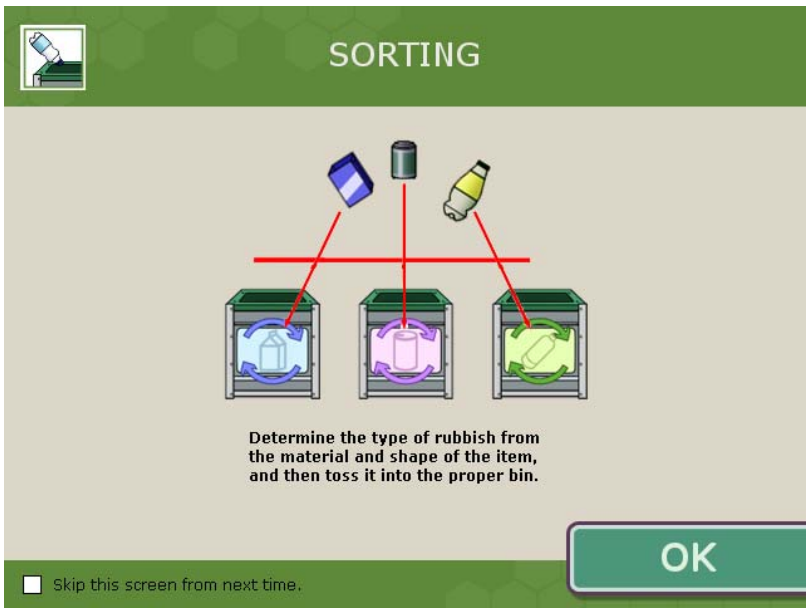

Supplement: s1 [file s1]
