# Supplementary material for: Cognitive Training Therapy Improves the Effect of Hypocaloric Treatment on Subjects with Overweight/Obesity: A Randomised Clinical Trial
Source: MDPI journal article supplement (doi:10.3390/nu11040925), 2019-04-24

**Supplementary information. Figure S1.** Baseline performance on the Iowa Gambling task for the five blocks of task execution in both CONTROL and COGNITIVE groups. Mean differences were analyzed by a *t*-test. Significance level is shown in parenthesis.

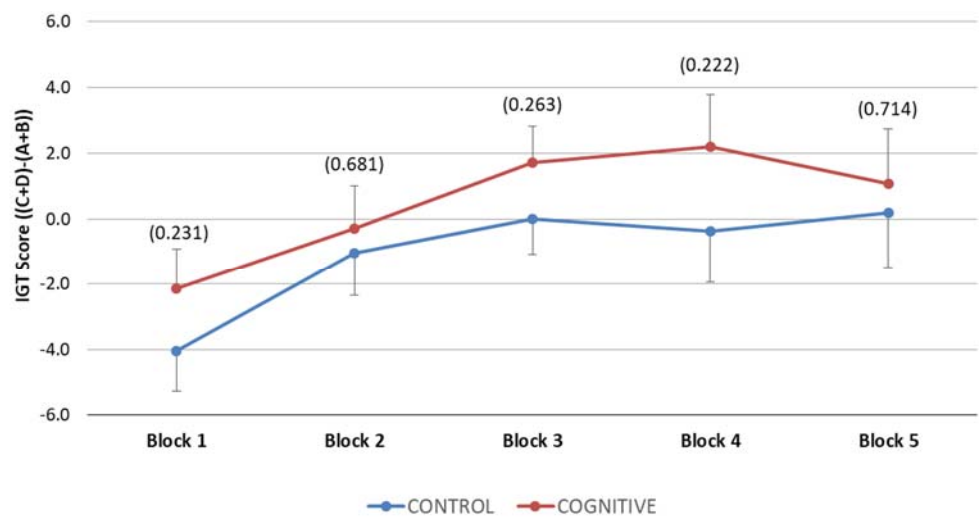

Supplement: s1 [file s1]
